# Supplementary material
Source: Elsevier journal article supplement (https://www.sciencedirect.com/science/article/pii/S1646289016300176)
Supplement: mmc1 [file S1646289016300176:mmc1.pdf]

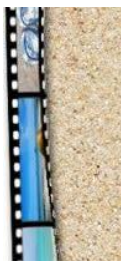

# Escala de Auto-estima Global

**Autor:** Rosenberg, M. (1989); **Adaptação Portuguesa:** Faria L. & Silva S. (1999)

Segue-se uma lista de afirmações respeitantes ao modo como se sente acerca de si próprio(a).

À frente de cada uma delas assinale com uma cruz (X), na respectiva coluna, a resposta que mais se lhe adequa.

- A** - Concordo totalmente
- B** - Concordo
- C** - Concordo parcialmente
- D** - Discordo parcialmente
- E** - Discordo
- F** - Discordo totalmente.

|                                                                                             | A | B | C | D | E | F |
|---------------------------------------------------------------------------------------------|---|---|---|---|---|---|
| Globalmente estou satisfeito(a) comigo próprio(a) (aeg01)                                   |   |   |   |   |   |   |
| Por vezes penso que nada valho (aeg02)                                                      |   |   |   |   |   |   |
| Sinto que tenho um bom número de qualidades (aeg03)                                         |   |   |   |   |   |   |
| Sou capaz de fazer as coisas tão bem como a maioria das outras pessoas (aeg04)              |   |   |   |   |   |   |
| Sinto que não tenho muito de que me orgulhar (aeg05)                                        |   |   |   |   |   |   |
| Por vezes sinto-me de facto um(a) inútil (aeg06)                                            |   |   |   |   |   |   |
| Sinto que sou uma pessoa com valor, pelo menos num plano de igualdade com os outros (aeg07) |   |   |   |   |   |   |
| Gostaria de ter mais respeito por mim próprio(a) (aeg08)                                    |   |   |   |   |   |   |
| Em termos gerais inclino-me a achar que sou um(a) falhado(a) (aeg09)                        |   |   |   |   |   |   |
| Adopto uma atitude positiva perante mim próprio(a) (aeg10)                                  |   |   |   |   |   |   |
